1 **Negative interactions and virulence differences drive the dynamics in**  
2 **multispecies bacterial infections**

3

4

5 Désirée A. Schmitz<sup>a</sup>, Richard C. Allen<sup>a</sup> & Rolf Kümmerli<sup>a</sup>

6 <sup>a</sup> Department of Quantitative Biomedicine, University of Zurich, Winterthurerstrasse  
7 190, 8057 Zurich, Switzerland

8 Correspondence to: [desiree.schmitz@uzh.ch](mailto:desiree.schmitz@uzh.ch) or [rolf.kuemmerli@uzh.ch](mailto:rolf.kuemmerli@uzh.ch)

9

10 Competing interests statement: The authors declare that they have no conflict of interests.

11 Funding for this project comes from the Swiss National Science Foundation (grant no.

12 31003A\_182499 to RK) and from the Novartis Foundation for Medical-Biological

13 Research (to RK).

14 **Abstract**

15 Bacterial infections are often polymicrobial, leading to intricate pathogen-pathogen and  
16 pathogen-host interactions. There is increasing interest in studying the molecular basis  
17 of pathogen interactions and how such mechanisms impact host morbidity. However,  
18 much less is known about the ecological dynamics between pathogens and how they  
19 affect virulence and host survival. Here we address these open issues by co-infecting  
20 larvae of the insect model host *Galleria mellonella* with one, two, three or four bacterial  
21 species, all of which are opportunistic human pathogens. We found that virulence was  
22 always driven by the most virulent species regardless of the number of species and  
23 pathogen combinations injected. Moreover, we observed a link between a pathogen's  
24 virulence and its growth within the host. In certain cases, the more virulent pathogen  
25 simply outgrew the less virulent pathogen. In other cases, we found evidence for  
26 negative interactions between pathogens inside the host, whereby the more virulent  
27 pathogen typically won a competition. Taken together, our findings reveal positive links  
28 between a pathogen's growth inside the host, its competitiveness towards other  
29 pathogens, and its virulence. Beyond being generalizable across species  
30 combinations, our findings suggest that treatment strategies against polymicrobial  
31 infections should target the most virulent species.

## 32 Introduction

33

34 Research over the past decades has revealed that many bacterial infections are  
35 polymicrobial [1]–[4]. This can lead to complicated pathogen-pathogen and pathogen-  
36 host interactions. The ecological interactions between pathogens can range from  
37 competition through commensalism to cooperation, and such interactions can have  
38 consequences for the host [5]. For example, mutually beneficial cross-feeding between  
39 a human commensal bacterium and a pathogen was shown to increase the virulence  
40 of the latter, thus exacerbating host morbidity [6]. Competition can also enhance  
41 virulence as revealed for the pathogen *Pseudomonas aeruginosa* which increases the  
42 production of the toxin pyocyanin that harms both its competitor *Staphylococcus*  
43 *aureus* and host tissue [7]. Interaction patterns can become even more complex in  
44 chronic infections, where (co-)evolution can occur between pathogens and between  
45 pathogens and the host [8]–[13]. There is increasing awareness that such eco-  
46 evolutionary dynamics affect host health and are important to consider regarding  
47 treatment options [5].

48 For this reason, research on interactions between pathogenic bacteria has  
49 flourished in the past years. For example, there is a wealth of work on interactions  
50 between *P. aeruginosa* and *S. aureus*, two of the most troublesome nosocomial  
51 pathogens [14]–[16]. This research, often carried out *in vitro*, has successfully  
52 identified molecular mechanisms of pathogen interactions and evolutionary patterns of  
53 how pathogens adapt to one another. However, we know much less about pathogen-  
54 pathogen interactions within hosts and how interactions drive virulence. Moreover, it is  
55 often unclear whether insights from a particular pathogen pair are generalizable and  
56 hold for other pathogen and strain combinations [17].

57           Here, we aim to tackle these questions by studying bacterial interactions  
58 between four different opportunistic human pathogens in an insect host, the larvae of  
59 the greater wax moth *Galleria mellonella*. This model host is suitable for our purpose  
60 because it allows for relatively high-throughput experiments where many different  
61 pathogen combinations can be tested, and well-defined doses of pathogens can be  
62 injected into a larva. Moreover, *G. mellonella* has an innate immune system that  
63 resembles the vertebrate innate immune response and lives approximately at human  
64 body temperature, which makes it an excellent model organism to study human  
65 bacterial pathogenesis [18]–[21]. Regarding pathogens, our aim was to choose  
66 phylogenetically distinct species that are likely to exhibit different levels of virulence.  
67 We picked the following four opportunistic human pathogens. *Pseudomonas*  
68 *aeruginosa* (P) is a species of high clinical relevance that causes a number of both  
69 community- and hospital-acquired infections including skin and wound infections,  
70 urinary tract infections, bloodstream infections, and pneumonias [22], [23].  
71 *Burkholderia cenocepacia* (B) causes chronic lung infections in immunocompromised  
72 patients, e.g. suffering from cystic fibrosis [24]. *Klebsiella michiganensis* (K) belongs  
73 to the *K. oxytoca* complex [25], which are human pathogens that lead to health care-  
74 associated infections as well as to a variety of infections such as diarrhea, bacteremia,  
75 and meningitis [26]–[28]. *Cronobacter sakazakii* (C) can also cause bacteremia and  
76 meningitis as well as necrotizing enterocolitis and brain abscess/lesions [29]. While  
77 some of these pathogens can be found together – P and B in lung infections of cystic  
78 fibrosis patients [4], [30], [31] and P and K in burn wound infections [32], [33] – others  
79 might not naturally co-occur in an infection. However, natural co-occurrence is not the  
80 focus of our work. Instead, we aim to derive general principles of how different  
81 pathogens interact within the host and how this affects host survival.

82           In a first set of experiments, we aimed to understand the demographics of  
83 pathogen-host interactions in single species (mono) infections. For this purpose, we  
84 manipulated the injection dose and host age to understand how these factors affect  
85 each pathogen's virulence for the host. Second, we conducted mixed species infection  
86 experiments (double, triple, and quadruple) to assess how polymicrobial infections  
87 affect virulence patterns and host survival. Third, we enumerated pathogen growth  
88 within the host at two time points for all mono and pairwise infections to test whether  
89 pathogen load links to virulence. Fourth, we followed changes in pathogen frequencies  
90 in mixed infections to derive pathogen interaction patterns. While this approach does  
91 not reveal specific molecular mechanisms of pathogen interactions, it allows us to  
92 distinguish between negative, neutral, and positive interactions between co-infecting  
93 pathogens and how such interactions link to virulence.

## 94 **Material and Methods**

95

### 96 **Bacterial strains & host**

97 We used the following four opportunistic human pathogens: *Pseudomonas aeruginosa*  
98 PAO1 [34], *Burkholderia cenocepacia* K56-2 [35], *Klebsiella michiganensis*, and  
99 *Cronobacter sakazakii* (ATCC29004). We purchased the larvae of the greater wax  
100 moth *G. mellonella* in their last instar stage from a local vendor (Bait Express GmbH,  
101 Basel, Switzerland). Upon arrival, we stored them at 4-8° C without food. We  
102 considered larval age as the number of days after arrival in our laboratory, since the  
103 exact age of larvae was unknown to us. When examining larval age, we compared  
104 larvae that were ordered at the same time (i.e., same batch), but were infected at  
105 different time points.

106

### 107 **Culturing conditions of bacteria**

108 Bacterial stocks were kept in 25% glycerol and stored at -80° C. For all experiments,  
109 we grew bacteria overnight until stationary phase in 5 mL lysogeny broth (LB) in 50 mL  
110 Falcon tubes at 37° C and at 170 rpm with aeration (Infors HT, Multitron Standard  
111 Shaker). For all species, we centrifuged 1 mL overnight-cell culture in a 1.5 mL  
112 Eppendorf tube at 7'500 rcf for 5 min (Eppendorf, tabletop centrifuge MiniSpin plus with  
113 rotor F-45-12-11) and washed cultures three times with a 0.8% NaCl solution to remove  
114 all original media. Next, we measured the optical density at 600 nm (OD<sub>600</sub>) of the  
115 washed cell culture (Amersham Biosciences, Ultrospec 2100 pro spectrophotometer),  
116 adjusted it to OD<sub>600</sub>=1, and diluted each species individually to obtain similar cell  
117 numbers per milliliter for all species. All chemicals were purchased from Sigma Aldrich,  
118 Switzerland, unless indicated otherwise.

119

## 120 **Infection procedure**

121 We sorted larvae and evenly distributed them across treatments according to size.  
122 Their weight ranged from 278-731 mg with an average weight of 499 mg. We put larvae  
123 on ice in a petri dish to immobilize them. Next, we surface-sterilized larvae with 70%  
124 ethanol and injected them between the posterior prolegs. We used a sterile hypodermic  
125 needle (Braun, 0.45 x 12 mm BI/LB, 26G), a sterile syringe (Braun, 0.01-1 mL Injekt-F  
126 Luer Solo), and a programmable syringe pump (New Era Pump Systems Inc, model  
127 NE-300) to standardize injection speed. With a flow rate of 2 ml/h, we either injected  
128 10  $\mu$ L control or bacterial solution (both in 0.8 % NaCl) into larvae within 18 s. We had  
129 a second control treatment, where larvae were not injected. The injection dose ranged  
130 from  $10^2$  to  $10^6$  CFU for mono infections and was kept at  $10^5$  CFU for experiments that  
131 included multispecies infections. In multispecies infections, we mixed equal amounts  
132 of each species. For all experiments, we confirmed the injection dose in triplicate by  
133 counting colony forming units (CFU) on 1.5% LB agar plates. We distributed injected  
134 larvae to individual wells of a 12-well plate for incubation at 37° C in the dark without  
135 food. We monitored survival of every larva in regular intervals (hourly during 12-24  
136 hours post infection (hpi) and every two hours during 36-48 hpi). Larvae were  
137 considered dead when they did not move upon touch with a pipette tip.

138

## 139 **Bacterial load in the hemolymph**

140 We determined the bacterial load in all larvae that received mono-, mixed-, NaCl, and  
141 no infection at two time points, at 6 and 12 hpi. Since larvae had to be sacrificed during  
142 this process, we had two independent batches of larvae that were used for the  
143 respective timepoints. First, we placed larvae individually in 2 mL Eppendorf tubes and  
144 submerged those in ice until larval movement halted. Then, we opened each larva with  
145 a surgical blade (Aesculap AG, Germany) behind the posterior prolegs, with the cut

146 length spanning half of the body width. We sterilized the blade with 70% ethanol  
147 between different larvae. Next, we drained the hemolymph into a fresh 1.5 mL  
148 Eppendorf tube by gently squeezing the larva. The collected hemolymph was mixed  
149 and stored on ice. To enumerate bacterial CFU, we serially diluted 10  $\mu$ L of the  
150 collected hemolymph in 0.8% NaCl up to  $10^{-6}$  and plated the appropriate dilutions on  
151 LB-agar plates (1.5% agar) in duplicates. The appropriate dilutions varied between  $10^0$   
152 (undiluted) and  $10^{-6}$  and depended on the bacterial species. We incubated the plates  
153 at 37° C overnight and then manually counted CFU. Because *B. cenocepacia* grew  
154 slower than the other species, plates were incubated for two days. Plates with *C.*  
155 *sakazakii* were kept at room temperature for an additional day following overnight  
156 incubation for colonies to develop their characteristic yellow color. All four species  
157 could be distinguished from each other based on their different colony morphologies  
158 (see Fig. S3 in the supplemental information). We considered plates with a minimum  
159 of 25 CFU up to a number of CFU for which we could still distinguish single colonies  
160 with confidence. Plates with less than 25 CFU were only considered if none of the  
161 plated dilutions from the same individual adhered to this threshold. For mixes where  
162 one species occurred at very low frequency (mostly mixes with P), we plated the  
163 undiluted hemolymph to see whether the rare species was present at all. While both C  
164 and K were visible even in a lawn of P, this was not true for B. For this species  
165 combination, we cannot conclude that B was completely absent in certain larvae but  
166 rather that P was highly dominant. We calculated the CFU/larva by multiplying the  
167 volume of plated hemolymph with the average larval weight since larval weight is  
168 almost identical to larval liquid volume according to Andrea et al. [36].

169

170 In approximately 20% of the extracted larval hemolymph, we detected bacteria  
171 different from our four focal species. While the presence of other microbes can be



172 expected, we excluded these larvae from further analysis as it was unclear whether  
173 these bacteria represent other pathogens or are part of the natural microbiome of  
174 larvae. Nonetheless, we determined the identity of ten representative isolates by 16S  
175 rRNA sequencing (colony PCR using standard primers 1492r and 27f). We identified  
176 *Enterococcus casseliflavus*, and *E. gallinarum*, two common insect gut bacteria [37],  
177 [38], as the closest relatives of our isolates with sequence identities of 89-99%.

178

### 179 **Statistical analysis**

180 All statistical analyses were performed with R (version 4.1.1) and the interface RStudio  
181 (version 2021.09.0) [39]. For the dose-response curves in Fig. 1A, we measured mean  
182 survival time of the host as the area under the full survival curve using the function  
183 `survmean` from the `survival` package [40]. To build a log-logistic model we used the  
184 `drm` function from the `drc` package [41]. To compare host survival in mono versus  
185 mixed infections, we built a separate model for each panel shown in Fig. 2, comparing  
186 host survival of a particular pathogen combination. The statistical results were robust  
187 across three different methods comparing host survival: the non-parametric Log-rank  
188 test, the semi-parametric Cox proportional hazards model, and the parametric Weibull  
189 regression. See Table S1 for a model comparison.

190 To determine whether the pathogens significantly vary in their bacterial load in  
191 mono infections, we compared the CFU extracted from the hemolymph of host  
192 individuals at 6 hpi and 12 hpi. We chose a linear model using generalized least  
193 squares to account for differences in variance between the species, which was mainly  
194 caused by *K. michiganensis* at 12 hpi (see Table S3 for the full statistical analysis).  
195 Next, we performed a post-hoc analysis using the Tukey honest significant difference  
196 test with p-value adjustment to compare the bacterial load between species.

197 To compare bacterial load in the hemolymph in mono- versus mixed infections, we built  
198 a separate linear model for each pathogen to test whether its growth was influenced  
199 by the presence of another species, the CFU of this other species and time (at 6 hpi  
200 versus 12 hpi). Since the injection dose was always the same independent of how  
201 many species were injected, we compared for each species half the CFU found in  
202 mono infections to the total CFU (for the focal species) observed in pairwise infections.  
203 To obtain normally distributed residuals, we transformed all CFU values in our models.  
204 We used the function `transformTukey` from the `rcompanion` package to find the best  
205 transformation [42]. Non-significant interaction terms and main effects were removed  
206 from models until a minimal model was obtained. Most of the minimal models included  
207 both a main effect of the coinfecting species and its CFU effect. We often found that  
208 these two explanatory variables had opposing signs, which means that the influence  
209 of the co-infecting species on the focal species depended on the actual CFU of the  
210 coinfecting species. For this reason, we assessed the threshold CFU of the co-infecting  
211 pathogen at which its effect on the focal pathogen switches from being positive to being  
212 negative. This was done for each pathogen combination. We could then compare this  
213 CFU threshold to our experimental CFU values to check whether a coinfecting species  
214 stimulated or inhibited a focal species. To calculate the standard error for confidence  
215 intervals of this threshold and the p-value (one sample t-test versus zero) we used the  
216 Taylor expansion in the R package `propagate` [43].

## 217 **Results**

218

### 219 **Injection dose, host age, and species identity determine virulence**

220 To assess how the four different pathogens affect host survival, we exposed different  
221 age classes of *G. mellonella* larvae (5 - 15 days old prior to experimentation) to a range  
222 of pathogen injection doses (100 to 1 million colony forming units, CFU) for each of the  
223 four pathogens (B, C, K, P) and tracked their survival over 48 hours (Fig. 1A and 1B).

224 We found that the hazard to die differed between the four species (Cox  
225 proportional hazard:  $\chi^2_3 = 308.6$ ,  $p < 0.0001$ ) and was influenced by significant  
226 interactions between species and larval age ( $\chi^2_3 = 67.28$ ,  $p < 0.0001$ ), and species and  
227 injection dose ( $\chi^2_3 = 10.96$ ,  $p = 0.0119$ ). When examining these interactions more  
228 closely, we observed that the hazard to die grew significantly with increasing larval age  
229 for C ( $z = 2.69$ ,  $p = 0.0071$ ) and K ( $z = 6.43$ ,  $p < 0.0001$ ), but only marginally for B ( $z =$   
230  $1.90$ ,  $p = 0.0573$ ), and not at all for P ( $z = -0.72$ ,  $p = 0.471$ ). For the injection dose, we  
231 found that higher CFU significantly increased the hazard to die in all four species, but  
232 the hazard increase was more pronounced for B and P than for K and C (see Table S1  
233 for the full statistical analysis). The reason for the species-specific relationship between  
234 virulence and infection dose stems from the fact that the survival decreased in a log-  
235 linear fashion for B and P with higher pathogen doses, whereas C and K only became  
236 virulent above a certain threshold injection dose of about  $10^4$  CFU for K and  $10^5$  CFU  
237 for C.

238 Based on the insights from this experiment, we decided to use an injection dose  
239 of  $10^5$  CFU for all subsequent experiments. At this injection dose, all four pathogens  
240 are virulent with the following order of virulence: *P. aeruginosa* (P) > *B. cenocepacia*  
241 (B) > *K. michiganensis* (K) > *C. sakazakii* (C), and with significant host age effects for  
242 C and K (Fig. 1C).

243 **Virulence dynamics of multispecies infections are driven by the most virulent**  
244 **species**

245 Next, we compared host survival between mono and mixed infections. For this, we  
246 injected pairwise combinations of our four bacterial species into larvae of *G. mellonella*  
247 and observed their survival over 48 h (Fig. 2A). The injection dose was always  $10^5$   
248 CFU in total, with equal amounts of each co-injected species. An intuitive expectation  
249 is that the virulence in coinfections should be intermediate between the mono  
250 infections of the two species. In contrast to this expectation, we found that any mixed  
251 infection followed the dynamics of its most virulent species (Fig. 2B). A statistical  
252 examination confirmed that larval survival was not different between the mixed  
253 infection and the mono infection of the more virulent species in three out of six cases  
254 (Log-rank test B+K vs. B:  $p = 0.2459$ ; C+K vs. K:  $p = 0.9770$ ; C+P vs. P:  $p = 0.0548$ ).  
255 In the remaining three cases, survival in the mixed infection was significantly lower  
256 than the mono infection of the more virulent species (B+C vs. B:  $p = 0.0033$ ; B+P vs.  
257 P:  $p = 0.0230$ ; K+P vs. P:  $p = 0.0041$ ), but the actual biological differences observed  
258 are extremely small (Fig. 2B).

259 We then tested whether the same patterns arise in the four triple and the  
260 quadruple infections. As above, we kept the total number of CFU constant at  $10^5$  CFU  
261 and mixed equal amounts of each pathogen. As for the paired infections, we found that  
262 the survival trajectory of larvae infected with three and four pathogens followed the  
263 trajectories of the mono infection of the most virulent species in the mix (Fig. 2C). For  
264 example, in the triple infection with B, C, and K, larval survival followed the one of the  
265 B mono-infection, which is the most virulent of the three species. In the remaining four  
266 mixes, the most virulent species was P and in all these cases larval survival followed  
267 the one of P mono infections. Statistical analyses revealed subtle but significant  
268 differences: mixed infections with P were always slightly less virulent than the mono

269 infections with P (see Table S2 for the full statistical analysis). We can explain this  
270 pattern by a density effect: fewer P cells were injected in higher order infections, and  
271 thus bacteria needed more time to replicate and reach sufficient numbers to kill the  
272 larval host.

273 **The most virulent species is also more abundant both in mono and mixed**  
274 **infections**

275 We then asked what the underlying reason could be for our observation that the most  
276 virulent species drives host survival dynamics. One explanation would be that the more  
277 virulent species grows better in the host, making it more abundant and thereby exerting  
278 a stronger effect on the host. We tested this hypothesis in mono infections first and  
279 found that bacterial load (CFU per larva) of the four pathogens followed the exact order  
280 of their virulence at 12 hours post infection (hpi, see Fig. S2 in the supplemental  
281 information, and Table S3 for the full statistical analysis). At the earlier timepoint (6  
282 hpi), the same pattern holds for B, C, and P, whereas K had much higher CFU inside  
283 the host than expected from its virulence. The data imply that K initially grows well in  
284 larvae, while it is compromised later during the infection. Overall, the mono infection  
285 data suggest that pathogen load in a host positively links to its level of virulence (i.e.,  
286 negatively with host survival).

287 Next, we explored whether the same is true for mixed infections, i.e., whether  
288 the dominant effect of the more virulent species might be caused by its higher  
289 abundance in a coinfection. Indeed, in all cases the more virulent species was also the  
290 more abundant species at 12 hpi (Fig. 3). For example, P as the most virulent of our  
291 pathogens dominated in terms of abundance in all larvae in any of its mixes at 12 hpi.  
292 However, we also found evidence for more complex dynamics, where relative species  
293 abundance changed over time. Especially in the infection pairs K+P and K+B, we  
294 observed that K dominated at 6 hpi despite being the less virulent species, a pattern  
295 that disappeared at 12 hpi. Important to note is that in five out of six pairings both  
296 pathogen species coexisted in the host during the course of the infection in a large  
297 proportion of larvae.

298

## 299 **Negative interactions dominate in pairwise infections**

300 We used the CFU data from mixed infections to test whether the growth of any of the  
301 four species was influenced by the presence of a coinfecting species across two time  
302 points (at 6 and 12 hpi). We found that the coinfecting species had either no effect or  
303 a negative effect on a focal species in a pathogen-pair specific way (Fig. 4, see Table  
304 S4 for the full statistical analysis). The negative effect was either independent of how  
305 prevalent the coinfecting species was (main effect) or stronger with increasing CFU of  
306 the coinfecting species (CFU effect).

307 *B. cenocepacia* (B): The growth of this pathogen increased from 6 hpi to 12 hpi  
308 ( $t_{77} = 2.66$ ,  $p = 0.0095$ ), and was not affected by C ( $t_{77} = -0.10$ ,  $p = 0.9171$ ). In contrast,  
309 B growth was compromised by increasing numbers of K at the earlier timepoint and P  
310 at both timepoints (CFU effect of second species, for K:  $t_{77} = -4.73$ ,  $p < 0.0001$ ; for P:  
311  $t_{77} = -4.17$ ,  $p < 0.0001$ ). The presence of P at 12 hpi resulted in a CFU drop of B even  
312 below the inoculum size in many larvae.

313 *C. sakazakii* (C): In mono infections, this pathogen's CFU dropped below the  
314 inoculum size for both timepoints, suggesting that it cannot replicate within the host.  
315 While the presence of B did not affect C at any given time, both K and P significantly  
316 compromised C abundance (main effect, for K:  $t_{66} = -3.29$ ,  $p = 0.0016$ ; for P:  $t_{66} = -2.20$ ,  
317  $p = 0.0314$ ).

318 *K. michiganensis* (K): In line with the host survival data (Fig. 1), we found more  
319 CFU of this pathogen the older the larval host was ( $t_{71} = 4.27$ ,  $p < 0.0001$ ). The growth  
320 of K significantly decreased with higher CFU of the coinfecting B at both timepoints  
321 (CFU effect of B:  $t_{71} = -2.48$ ,  $p = 0.0156$ ). Interestingly, our model predicts that K  
322 reaches higher CFU if C is present at sufficiently high numbers (CFU effect of C:  $t_{71} =$   
323  $2.90$ ,  $p = 0.0050$ ), but because C never reached high CFU itself, the overall effect of C  
324 on K was negative in our experiments (main effect of C:  $t_{71} = -2.92$ ,  $p < 0.0047$ ).

325 *P. aeruginosa* (P): The CFU of P significantly increased from 6 to 12 hpi ( $t_{73} =$   
326 9.89,  $p < 0.0001$ ). P growth was only affected by K, which had a strong negative impact  
327 at 6 hpi (CFU effect of K:  $t_{73} = -4.40$ ,  $p < 0.0001$ ).

328 While the number of interactions decreased over time (58% at 6 hpi; 42% at 12  
329 hpi), all interactions were negative at both timepoints. Our four bacterial species  
330 spanned from being inhibited by one (P) or two other species (B, C, K) and inhibiting  
331 one (B, C), two (P) or three (K) other species (Fig. 4B).



## 332 Discussion

333 There is increasing evidence that polymicrobial infections are common [1]–[4] and that  
334 ecological and evolutionary interactions between co-infecting pathogens can affect  
335 host morbidity [5]–[7]. In our study, we examined whether there are generalizable  
336 patterns that characterize interaction dynamics between pathogens and a common  
337 host in polymicrobial infections. For our experiments, we used the larvae of *G.*  
338 *mellonella* as the host and infected it with four opportunistic human bacterial pathogens  
339 alone and in all possible combinations of mixed infections. We tested the rank order of  
340 virulence for the four pathogens and found that it was identical to the rank order of  
341 growth in the host. In addition, the more virulent species in mono infections were also  
342 better at outcompeting other species in mixed infections. A consequence of this was  
343 that the most virulent species determined host survival dynamics in mixed infections  
344 regardless of the number and type of pathogens mixed. Our findings, which held for all  
345 pathogen combinations tested, reveal an infection dynamic that is not covered by any  
346 of the current models for pathogen virulence in mixed infections.

347 While we found that the virulence of a specific pathogen is positively linked to  
348 its growth and competitiveness in the host, our co-occurrence analysis could give us  
349 an idea of the relative importance of pathogen growth versus competitiveness and how  
350 it varies across pathogen species combinations (Fig. 4). In the pathogen interaction  
351 network (Fig. 4B), the absence of an interaction suggests that differences in growth  
352 dominate a co-infection, meaning that the faster growing species simply outperformed  
353 the slower growing one. This was the case for five (6 hpi) and seven (12 hpi) out of the  
354 total twelve interactions. Conversely, the remaining seven (6 hpi) and five (12 hpi)  
355 interactions that were negative would imply that competitiveness played a more  
356 prominent role. At least two types of competition could be involved. First, the faster-  
357 growing species limits resource availability for the slow-growing species, reducing its

358 growth and survival due to starvation. Second, the more competitive species secretes  
359 a toxin that directly targets and kills the less competitive species in interference  
360 competition. While our results do not allow to differentiate between resource and  
361 interference competition [44], it is likely that both mechanisms matter. For example, in  
362 our mixed infections with K+B, and K+P, we observed that K inhibits its competitors  
363 early on during the infections (6 hpi) but is outcompeted at a later stage (12 hpi).  
364 Because resources are unlikely to be limited early in the infection, the inhibitory effects  
365 can be explained by K secreting a toxin, while the dominance of B and P later in the  
366 infection could be due to resource competition advantages. Alternatively, it could be  
367 that K grows quickly but inefficiently while its competitors (B and P) grow more slowly  
368 but efficiently and thus outpace K over time.

369       Important to note is also that all pathogen interactions were either negative or  
370 neutral, but never positive. This finding supports the view that competition is much  
371 more prevalent between bacterial species than positive interactions, where one  
372 species unilaterally or mutually benefits another species [45], [46]. The prevalence of  
373 competitive interactions is perhaps expected given that the pathogens interacted in a  
374 closed environment (i.e., the larva), where both resource availability and host longevity  
375 are limited [47].

376       Competition between pathogens is also a major component of mathematical  
377 models predicting virulence levels [48]. A traditional set of models assumes that  
378 genetically diverse pathogens engage in increased levels of resource competition in  
379 mixed infections, which is predicted to exacerbate virulence [47]. Other models  
380 examined the effect of infighting between pathogens through toxin secretion [49] or  
381 competition for publicly shared virulence factors [50]. These models predict that  
382 increased competition between pathogens should decrease virulence in mixed  
383 infections. Empirical support for these models vary, lending support to both types of

384 predictions [51]–[54]. A key insight from these studies is that the biological details of  
385 pathogen interactions matter. While our study was not designed to test specific model  
386 predictions, our results put forth a third virulence scenario, namely that pathogen  
387 interactions in mixed infections neither increase nor decrease virulence, but the  
388 virulence trajectory simply follows that of the more harmful species. A first example of  
389 this scenario was reported by Massey et al. [53] and here we reveal its generality. As  
390 discussed above, this pattern can arise when pathogen traits that are relevant for  
391 infections (virulence, growth, and competitiveness) are positively connected with one  
392 another.

393 Our data further indicate that host factors also influence pathogen virulence  
394 patterns. For example, we found that younger larvae had longer survival times than  
395 older larvae when infected with B, C, and K. Given that *G. mellonella* has an innate  
396 immune system similar to the one of vertebrates, our results indicate that the immune  
397 response works well against weaker pathogens (like C and K) but deteriorates with  
398 age. Another host effect we observed is that *G. mellonella* managed to control  
399 infections of C and K at low injection doses, again highlighting the potency of the  
400 insect's immune system. All these host effects vanished in infections with P, the most  
401 virulent pathogen in our experiment, which seems to simply overrule host effects.  
402 Clearly, host effects are important and likely feedback on pathogen-pathogen  
403 interactions, which is why they should be considered in future work on polymicrobial  
404 infections.

405 In conclusion, we can draw two generalities from our four-bacteria-infection  
406 system. First, no matter what pathogen combination we used, the most virulent  
407 pathogen dictated host survival. This indicates that targeting the most virulent  
408 pathogen seems the most promising strategy to treat polymicrobial infections. Second,  
409 more virulent pathogens grow better in the host and are better in competition with less

410 virulent pathogens. These observations suggest that the same traits (or co-regulated  
411 traits) responsible for attacking the host (e.g., virulence factors) could promote  
412 pathogen growth and help in competition with other pathogens. Identifying these traits  
413 could give rise to promising strategies to control polymicrobial infections.

414 **Data availability**

415 All raw data sets will be deposited in the figshare repository (LINK).

416

417 **Supplementary information**

418 Supplementary information will be made available online: Supplemental file, XLSX file,

419 XX MB.

420

421 **Acknowledgements**

422 We thank Kayla King, Anna-Liisa Laine, Alex Hall, and Roland Regoes for their

423 scientific inputs. We also thank Nadine Koch for showing us how to conduct injections

424 with the larvae of *G. mellonella*.

425

426 **Funding**

427 This project has received funding from the Swiss National Science Foundation (grant

428 no. 31003A\_182499 to RK) and from the Novartis Foundation for Medical-Biological

429 Research (to RK).

430

431 **Compliance with ethical standards**

432 Conflict of interest: The authors declare that they have no conflict of interest.

433

434 **References**

435 [1] B. M. Peters, M. A. Jabra-rizk, J. W. Costerton, and M. E. Shirtliff, "Polymicrobial  
436 Interactions: Impact on Pathogenesis and Human Disease," *Clin. Microbiol.*  
437 *Rev.*, vol. 25, no. 1, pp. 193–213, 2012.

438 [2] K. A. Brogden, J. M. Guthmiller, and C. E. Taylor, "Human polymicrobial  
439 infections," *Lancet*, vol. 365, no. 9455, pp. 253–255, 2005.

- 440 [3] F. L. Short, S. L. Murdoch, and R. P. Ryan, “Polybacterial human disease: the  
441 ills of social networking,” *Trends Microbiol.*, vol. 22, no. 9, pp. 508–516, 2014.
- 442 [4] A. Folkesson *et al.*, “Adaptation of *Pseudomonas aeruginosa* to the cystic  
443 fibrosis airway: An evolutionary perspective,” *Nat. Rev. Microbiol.*, vol. 10, no.  
444 12, pp. 841–851, 2012.
- 445 [5] C. Rezzoagli, E. T. Granato, and R. Kümmerli, “Harnessing bacterial interactions  
446 to manage infections: a review on the opportunistic pathogen *Pseudomonas*  
447 *aeruginosa* as a case example,” *J. Med. Microbiol.*, vol. 68, no. 12, pp. 1–15,  
448 2019.
- 449 [6] A. Stacy, J. Everett, P. Jorth, U. Trivedi, K. P. Rumbaugh, and M. Whiteley,  
450 “Bacterial fight-and-flight responses enhance virulence in a polymicrobial  
451 infection,” *Proc. Natl. Acad. Sci. U. S. A.*, vol. 111, no. 21, pp. 7819–7824, 2014.
- 452 [7] A. Korgaonkar, U. Trivedi, K. P. Rumbaugh, and M. Whiteley, “Community  
453 surveillance enhances *Pseudomonas aeruginosa* virulence during polymicrobial  
454 infection,” *Proc. Natl. Acad. Sci. U. S. A.*, vol. 110, no. 3, pp. 1059–1064, 2013.
- 455 [8] S. A. Frank, “Models of plant-pathogen coevolution,” *Trends Genet.*, vol. 8, no.  
456 6, pp. 213–219, 1992.
- 457 [9] S. A. Frank, “Coevolutionary genetics of plants and pathogens,” *Evol. Ecol.*, vol.  
458 7, no. 1, pp. 45–75, 1993.
- 459 [10] M. Van Baalen, “Coevolution of recovery ability and virulence,” *Proc. R. Soc.*  
460 *London B*, vol. 265, no. 1393, pp. 317–325, 1998.
- 461 [11] A. Buckling and P. B. Rainey, “Antagonistic coevolution between a bacterium  
462 and a bacteriophage,” *Proc. R. Soc. London B*, vol. 269, no. 1494, pp. 931–936,  
463 2002.
- 464 [12] A. Nourmohammad, J. Otwinowski, and J. B. Plotkin, “Host-Pathogen  
465 Coevolution and the Emergence of Broadly Neutralizing Antibodies in Chronic

- 466 Infections,” *PLoS Genet.*, vol. 12, no. 7, pp. 1–23, 2016.
- 467 [13] A. Papkou *et al.*, “The genomic basis of red queen dynamics during rapid  
468 reciprocal host–pathogen coevolution,” *Proc. Natl. Acad. Sci. U. S. A.*, vol. 116,  
469 no. 3, pp. 923–928, 2019.
- 470 [14] D. H. Limoli and L. R. Hoffman, “Help, hinder, hide and harm: What can we learn  
471 from the interactions between *Pseudomonas aeruginosa* and *Staphylococcus*  
472 *aureus* during respiratory infections?,” *BMJ*, vol. 74, no. 7. pp. 684–692, 2019.
- 473 [15] G. Orazi, K. L. Ruoff, and G. A. O’Toole, “*Pseudomonas aeruginosa* Increases  
474 the Sensitivity of Biofilm- Grown *Staphylococcus aureus* to Membrane-Targeting  
475 Antiseptics and Antibiotics,” *MBio*, vol. 10, no. 4, pp. 1–15, 2019.
- 476 [16] M. Tognon, T. Köhler, A. Luscher, and C. Van Delden, “Transcriptional profiling  
477 of *Pseudomonas aeruginosa* and *Staphylococcus aureus* during in vitro co-  
478 culture,” *BMC Genomics*, vol. 20, no. 1, pp. 1–15, 2019.
- 479 [17] S. Niggli and R. Kümmerli, “Strain Background, Species Frequency, and  
480 Environmental Conditions Are Important in Determining *Pseudomonas*  
481 *aeruginosa* and *Staphylococcus aureus* Population Dynamics and Species  
482 Coexistence,” *Appl. Environ. Microbiol.*, vol. 86, no. 18, pp. 1–14, 2020.
- 483 [18] G. Sheehan, A. Garvey, M. Croke, and K. Kavanagh, “Innate humoral immune  
484 defences in mammals and insects: The same, with differences?,” *Virulence*, vol.  
485 9, no. 1, pp. 1625–1639, 2018.
- 486 [19] C. J. Y. Tsai, J. M. S. Loh, and T. Proft, “*Galleria mellonella* infection models for  
487 the study of bacterial diseases and for antimicrobial drug testing,” *Virulence*, vol.  
488 7, no. 3, pp. 214–229, 2016.
- 489 [20] N. Ramarao, C. Nielsen-Leroux, and D. Lereclus, “The insect *Galleria mellonella*  
490 as a powerful infection model to investigate bacterial pathogenesis.,” *J. Vis. Exp.*  
491 *JoVE*, no. 70, pp. 1–7, 2012.

- 492 [21] J. C. Junqueira, “Galleria mellonella as a model host for human pathogens:  
493 Recent studies and new perspectives,” *Virulence*, vol. 3, no. 6, pp. 474–476,  
494 2012.
- 495 [22] J. Revuz *et al.*, “Toxic Epidermal Necrolysis,” *Arch. Dermatol.*, vol. 123, no. 9,  
496 pp. 1160–1165, 1987.
- 497 [23] R. Gaynes and J. R. Edwards, “Overview of nosocomial infections caused by  
498 gram-negative bacilli,” *Clin. Infect. Dis.*, vol. 41, no. 6, pp. 848–854, 2005.
- 499 [24] P. Vandamme *et al.*, “Occurrence of Multiple Genomovars of *Burkholderia*  
500 *cepacia* in Cystic Fibrosis Patients and Proposal of *Burkholderia multivorans* sp  
501 *. nov.*,” *Int. J. Syst. Bacteriol.*, vol. 47, no. 4, pp. 1188–1200, 1997.
- 502 [25] J. Yang, H. Long, Y. Hu, Y. Feng, A. McNally, and Z. Zong, “*Klebsiella oxytoca*  
503 Complex: Update on Taxonomy, Antimicrobial Resistance, and Virulence,” *Clin.*  
504 *Microbiol. Rev.*, vol. 35, no. 1, 2022.
- 505 [26] R. Podschun and U. Ullmann, “*Klebsiella* spp. as nosocomial pathogens:  
506 Epidemiology, taxonomy, typing methods, and pathogenicity factors,” *Clin.*  
507 *Microbiol. Rev.*, vol. 11, no. 4, pp. 589–603, 1998.
- 508 [27] C. Högenauer *et al.*, “*Klebsiella oxytoca* as a Causative Organism of Antibiotic-  
509 Associated Hemorrhagic Colitis,” *N. Engl. J. Med.*, vol. 355, no. 23, pp. 2418–  
510 26, 2006.
- 511 [28] N. Neog, U. Phukan, M. Puzari, M. Sharma, and P. Chetia, “*Klebsiella oxytoca*  
512 and Emerging Nosocomial Infections,” *Curr. Microbiol.*, vol. 78, no. 4, pp. 1115–  
513 1123, 2021.
- 514 [29] C. Iversen *et al.*, “The taxonomy of *Enterobacter sakazakii*: Proposal of a new  
515 genus *Cronobacter* gen. nov. and descriptions of *Cronobacter sakazakii* comb.  
516 nov. *Cronobacter sakazakii* subsp. *sakazakii*, comb. nov., *Cronobacter sakazakii*  
517 subsp. *malonaticus* subsp. nov., ...,” *BMC Evol. Biol.*, vol. 7, no. 64, pp. 1–11,



- 518 2007.
- 519 [30] J. R. W. Govan and V. Deretic, "Microbial pathogenesis in cystic fibrosis: Mucoïd  
520 *Pseudomonas aeruginosa* and *Burkholderia cepacia*," *Microbiol. Rev.*, vol. 60,  
521 no. 3, pp. 539–574, 1996.
- 522 [31] L. Eberl and B. Tümmler, "Pseudomonas aeruginosa and Burkholderia cepacia  
523 in cystic fibrosis: Genome evolution, interactions and adaptation," *Int. J. Med.*  
524 *Microbiol.*, vol. 294, no. 2–3, pp. 123–131, 2004.
- 525 [32] H. A. Abbas, E. M. El-Masry, and G. H. Shaker, "Bacterial Etiology and  
526 Antimicrobial Resistance of," *Int. J. Biol. Pharm. Res.*, vol. 4, no. 12, pp. 1251–  
527 1255, 2013.
- 528 [33] O. A. Forson, E. Ayanka, M. Olu-Taiwo, P. J. Pappoe-Ashong, and P. J. Ayeh-  
529 Kumi, "Bacterial infections in burn wound patients at a tertiary teaching hospital  
530 in Accra, Ghana.," *Ann. Burns Fire Disasters*, vol. 30, no. 2, pp. 116–120, 2017.
- 531 [34] C. K. Stover *et al.*, "Complete genome sequence of *Pseudomonas aeruginosa*  
532 PAO1, an opportunistic pathogen," *Nature*, vol. 406, no. 6799, pp. 959–964,  
533 2000.
- 534 [35] E. Mahenthiralingam *et al.*, "Diagnostically and experimentally useful panel of  
535 strains from the *Burkholderia cepacia* complex," *J. Clin. Microbiol.*, vol. 38, no.  
536 2, pp. 910–913, 2000.
- 537 [36] A. Andrea, K. A. Krogfelt, and H. Jenssen, "Methods and challenges of using the  
538 greater wax moth (*Galleria mellonella*) as a model organism in antimicrobial  
539 compound discovery," *Microorganisms*, vol. 7, no. 3, pp. 1–9, 2019.
- 540 [37] B. Y. Peng *et al.*, "Biodegradation of Polystyrene by Dark (*Tenebrio obscurus*)  
541 and Yellow (*Tenebrio molitor*) Mealworms (Coleoptera: Tenebrionidae),"  
542 *Environ. Sci. Technol.*, vol. 53, no. 9, pp. 5256–5265, 2019.
- 543 [38] C. N. Allonsius, W. Van Beeck, I. De Boeck, S. Wittouck, and S. Lebeer, "The

- 544 microbiome of the invertebrate model host *Galleria mellonella* is dominated by  
545 *Enterococcus*,” *Anim. Microbiome*, vol. 1, no. 1, pp. 1–7, 2019.
- 546 [39] R Core Team, “R: A language and environment for statistical computing.” R  
547 foundation for statistical computing, Vienna, Austria, 2021.
- 548 [40] T. M. Therneau and P. M. Grambsch, “Modeling Survival Data: Extending the  
549 Cox Model.” Springer, New York, 2000.
- 550 [41] C. Ritz, F. Baty, J. C. Streibig, and D. Gerhard, “Dose-Response Analysis Using  
551 R,” *PLoS One*, vol. 10, no. 12, p. e0146021, 2015.
- 552 [42] S. Mangiafico, “rcompanion: Functions to Support Extension Education Program  
553 Evaluation. R package version 2.4.1,” vol. 10. p. 146021, 2021.
- 554 [43] A.-N. Spiess, “propagate: Propagation of Uncertainty. R package version 1.0-6.”  
555 2018.
- 556 [44] M. Ghoul and S. Mitri, “The Ecology and Evolution of Microbial Competition,”  
557 *Trends Microbiol.*, vol. 24, no. 10, pp. 833–845, 2016.
- 558 [45] N. M. Oliveira, R. Niehus, and K. R. Foster, “Evolutionary limits to cooperation in  
559 microbial communities,” *Proc. Natl. Acad. Sci. U. S. A.*, vol. 111, no. 50, pp.  
560 17941–17946, 2014.
- 561 [46] K. R. Foster and T. Bell, “Competition, not cooperation, dominates interactions  
562 among culturable microbial species,” *Curr. Biol.*, vol. 22, no. 19, pp. 1845–1850,  
563 2012.
- 564 [47] S. A. Frank, “Models of Parasite Virulence Steven,” *Q. Rev. Biol.*, vol. 71, no. 1,  
565 pp. 37–78, 1996.
- 566 [48] A. Buckling and M. A. Brockhurst, “Kin selection and the evolution of virulence,”  
567 *Heredity (Edinb)*., vol. 100, no. 5, pp. 484–488, 2008.
- 568 [49] R. F. Inglis, A. Gardner, P. Cornelis, and A. Buckling, “Spite and virulence in the  
569 bacterium *Pseudomonas aeruginosa*,” *Proc. Natl. Acad. Sci.*, vol. 106, no. 14,

570 pp. 5703–5707, 2009.

571 [50] S. A. West and A. Buckling, “Cooperation , virulence and siderophore production  
572 in bacterial parasites,” *Proc. R. Soc. London B*, vol. 270, no. 1510, pp. 37–44,  
573 2003.

574 [51] A. F. Read and L. H. Taylor, “The Ecology of Genetically Diverse Infections,”  
575 *Science (80-. )*, vol. 292, no. 5519, pp. 1099–1103, 2001.

576 [52] E. T. Granato, C. Ziegenhain, R. L. Marvig, and R. Kümmerli, “Low spatial  
577 structure and selection against secreted virulence factors attenuates  
578 pathogenicity in *Pseudomonas aeruginosa*,” *ISME J.*, vol. 12, no. 12, pp. 2907–  
579 2918, 2018.

580 [53] R. C. Massey, A. Buckling, and R. Ffrench-Constant, “Interference competition  
581 and parasite virulence,” *Proc. R. Soc. London B*, vol. 271, pp. 785–788, 2004.

582 [54] M. Boots and M. Meador, “Local Interactions Select for Lower Pathogen  
583 Infectivity,” *Science*, vol. 315, no. 5816, pp. 1284–1286, 2007.

584

585 **Figures**

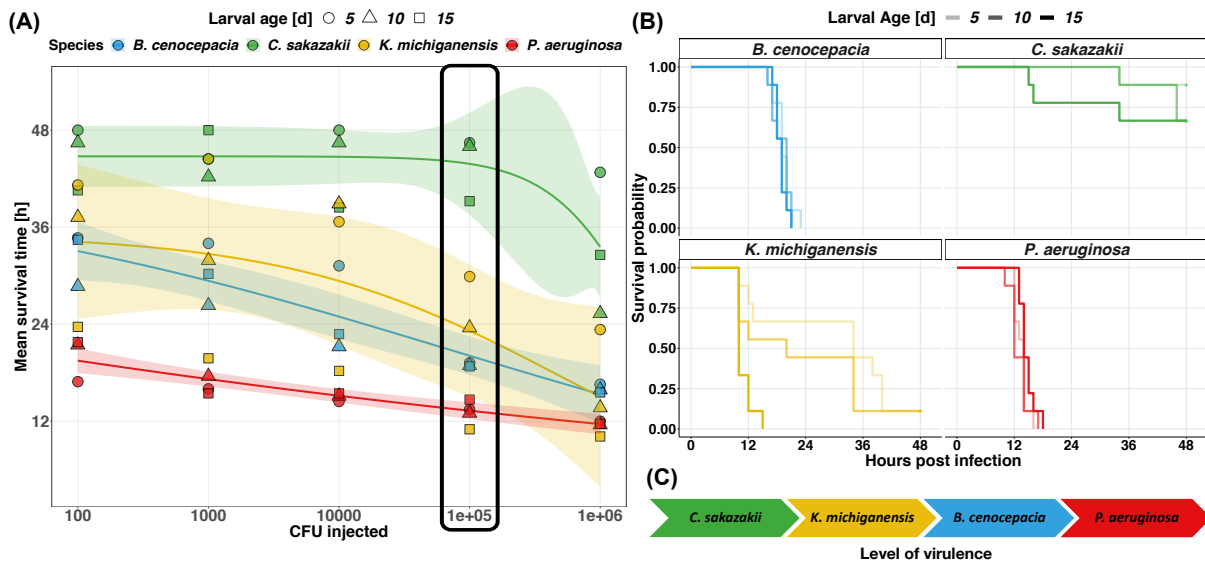

586

587 **Figure 1.** Survival rates of greater wax moth larvae (*G. mellonella*) are affected by the  
588 pathogen species they are infected with, injection dose, and larval age. (A) Mean  
589 survival time of *G. mellonella* larvae (measured as the area under the full survival  
590 curve) as a function of larval age (5, 10, 15 days), injection dose (CFU = colony forming  
591 units), and pathogen species (blue: *B. cenocepacia*, green: *C. sakazakii*, yellow: *K.*  
592 *michiganensis*, red: *P. aeruginosa*). The lines and the shaded area (95% CI) depict the  
593 relationship between mean survival time (across the different larval ages and  
594 replicates) and infection dose for each species. The black box highlights the injection  
595 dose chosen for all subsequent experiments. (B) Kaplan Meier survival curves of *G.*  
596 *mellonella* larvae for an injection dose of 10<sup>5</sup> CFU for each of the four pathogen  
597 species. Larval age – 5, 10, and 15 days old – is indicated by increasing line  
598 opacity. (C) The arrow chart shows the order of virulence level among the four  
599 bacterial pathogens, from lowest to highest based on our experimental data. Data are  
600 from three independent experiments, each featuring 10-12 larvae per treatment,  
601 resulting in a total of 30-36 larvae per treatment.

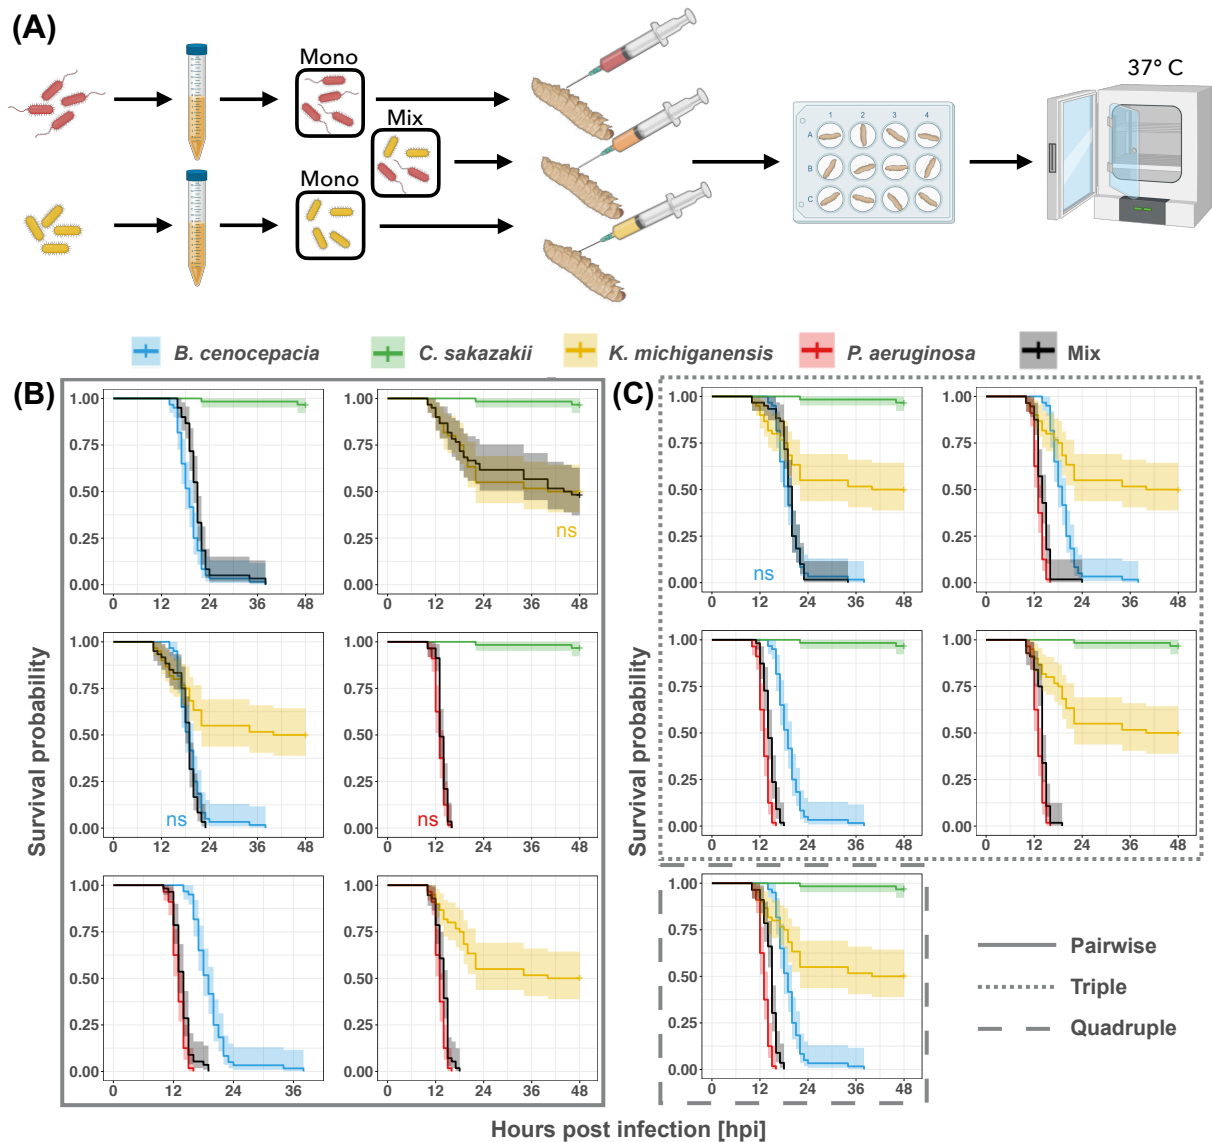

602

603 **Figure 2.** Host survival dynamics of *G. mellonella* larvae of pairwise, triple, and  
 604 quadruple bacterial infections follow the pattern of the mono infection of the most  
 605 virulent pathogen in a mix. (A) Schematic overview of the experimental setup with the  
 606 example of the mono and pairwise infections of *P. aeruginosa* (red) and *K.*  
 607 *michiganensis* (yellow). A total of  $10^5$  CFU was injected into *G. mellonella* larvae with  
 608 equal amounts of each species in a mix. Kaplan Meier survival curves of mono  
 609 (respective colored curves) versus pairwise (B), triple, and quadruple (C) (black  
 610 curves) infections with the shaded area indicating the 95% CI. The denotation ns (non-  
 611 significance) marks cases for which survival does not significantly differ between the  
 612 mono infection of the colored pathogen compared to the black mix in the same panel.  
 613 In all other cases, we found significant differences. Data are from five independent  
 614 experiments, each with 10-12 larvae per treatment, resulting in a total of 50-60 larvae  
 615 per treatment.

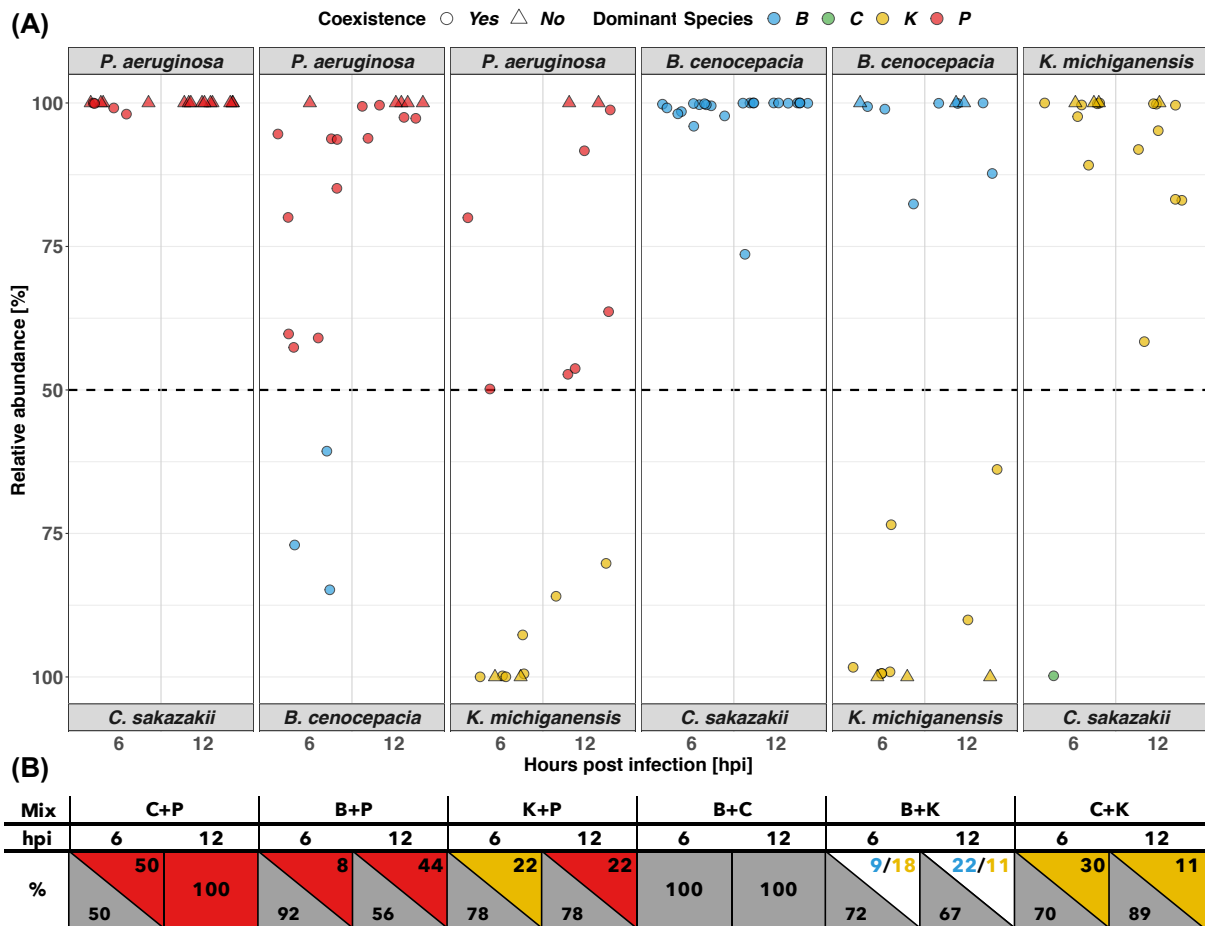

616

617

618

619

620

621

622

623

624

625

626

627

628

629

630

631

**Figure 3.** The more virulent pathogen is more abundant in pairwise infections and coexistence is present for five out of six pairings throughout the infection. (A) Relative abundance in pairwise infections of *G. mellonella* larvae at 6 and 12 hours post infection (hpi). The panels follow the order of the more virulent species in the mix, from left to right, with the more virulent species being indicated on top of each panel. Each datapoint represents one larva and is colored according to its more abundant pathogenic species. Circular datapoints represent pairwise infections in which both pathogens were found at 6 hpi or 12 hpi and triangles indicate datapoints for which only one of the injected species remained in the host. (B) Rectangles and triangles show the percentage of larvae in which either coexistence (grey) of pathogens occurred or only a single species (color) was left. Data are shown for all pairwise infections both at 6 hpi and 12 hpi. Values of 100% in panel A highlight larvae in which the rarer species was either no longer present or below the detection limit. Data are from 4-5 individual experiments with 2-3 larvae per treatment, resulting in a total of 8-12 larvae per treatment.

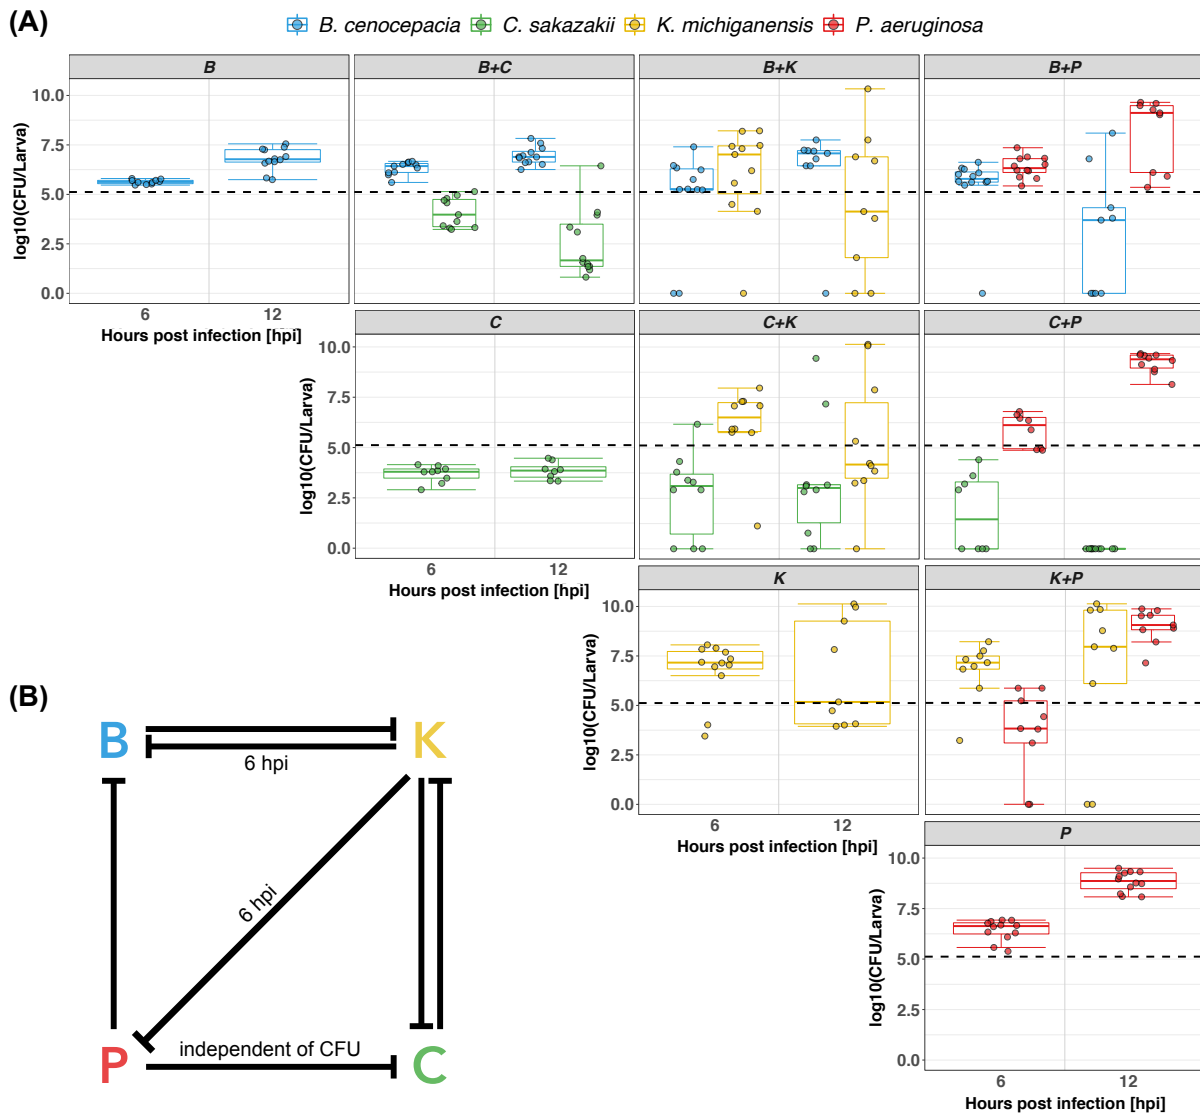

632

633 **Figure 4.** Bacterial load in *G. mellonella* larvae infected with a single pathogen or pairs  
 634 of pathogens 6 and 12 hours post infection (hpi). (A) Boxplots depict the number of  
 635 colony forming units (CFU) per larva for the mono infections of B, C, K, and P, and all  
 636 pairwise infections for the two time points measured. Dots represent data from  
 637 individual larvae. The dashed black line shows the injection dose of 50 000 CFU per  
 638 species in mixed infections. The dose for mono infections was 100 000 CFU. To be  
 639 able to directly compare the CFU between mono and mixed infections, we halved the  
 640 actual CFU counts obtained from the mono infections. Boxplots show the median (line  
 641 within the box) with the first and third quartiles. The whiskers cover 1.5x of the  
 642 interquartile range or extend from the lowest to the highest value if all values fall within  
 643 the 1.5x interquartile range. Data are from 4-5 individual experiments, each featuring  
 644 2-3 larvae per treatment, resulting in a total of 8-12 larvae per treatment. (B) Interaction  
 645 network of our bacterial consortium based on the statistical analysis of the data for both  
 646 timepoints unless indicated otherwise. Significant negative impact of one species on

647 another is depicted by a stop arrow. The label “independent of CFU” indicates that this  
648 effect was not determined by the amount of the coinfecting pathogen.
